# Supplementary material for: The insertion of gas molecules into polyhedral oligomeric silsesquioxane (POSS) cages: understanding the energy of insertion using quantum chemical calculations
Source: Royal Society of Chemistry journal article supplement (doi:10.1039/c3cp43738h), 2013-01-01
Supplement: c3cp43738h.pdf [file c3cp43738h.pdf]

Supplemental Information

**Table S1 : Si-O-Si angles (deg) of T<sub>10</sub> (types defined in Figure 1a) with absorption by the molecules. O-Si-O angles are also shown for structures with the molecules at the face. Where different angles were found for the same type, the angle that showed the largest modification from the POSS cage without an absorbate was chosen. Angles are in degrees. At the B3LYP (6-311++(d,p)) level of theory.**

|                       | Center |        | Face             |                  |                  |
|-----------------------|--------|--------|------------------|------------------|------------------|
|                       | side   | face   | side             | face             | O-Si-O           |
| O <sub>2</sub> (up)   | 159.3  | 151.3  | 151.8            | 157.4            | 117.8            |
| O <sub>2</sub> (side) | 150.6  | 156.4  |                  |                  |                  |
| N <sub>2</sub> (up)   | 157.1  | 153.2  | 149.95           | 155.7            | 117.43           |
| N <sub>2</sub> (side) | 156.4  | 147.1  |                  |                  |                  |
| H <sub>2</sub>        | 152.0  | 155.3  | 154.2            | 154.1            | 113.0            |
| CO                    | 160.0  | 151.65 | 153.7<br>(C-out) | 153.1<br>(C-out) | 116.7<br>(C-out) |
|                       |        |        | 149.7 (C-in)     | 156.5 (C-in)     | 116.9 (C-in)     |
| CO <sub>2</sub>       | 173.5  | 145.3  | 160.0            | 149.9            | 116.8            |
| Water                 | 145.5  | 163.9  | 147.9            | 141.0            | 154.1            |
| He                    | 153.2  | 155.3  | 153.7            | 155.0            | 111.1            |
| CH <sub>4</sub>       | 151.6  | 155.8  | 158.2            | 144.68           | 123.5            |

Brackets indicate the configuration defined in the text.

**Table S2 : Si-O-Si angles (deg) of T<sub>12</sub> (types defined in Figure 1b) with absorption by the molecules. Where different angles were found for the same type, the angle that showed the largest modification from the POSS without an absorbate was chosen. Angles are in degrees. At the B3LYP (6-311++(d,p)) level of theory.**

|                       | Center |       |       |       | Face             |                  |                  |                  |                  |
|-----------------------|--------|-------|-------|-------|------------------|------------------|------------------|------------------|------------------|
|                       | Face   | FE1   | FE2   | edge  | Face             | FE1              | FE2              | edge             | O-Si-O           |
| O <sub>2</sub> (up)   | 162.1  | 161.6 | 159.5 | 147.3 | 159.6            | 170.4            | 151.0            | 146.0            | 118.6            |
| O <sub>2</sub> (side) | 172.5  | 160.3 | 155.9 | 151.5 |                  |                  |                  |                  |                  |
| N <sub>2</sub> (up)   | 161.5  | 162.2 | 156.6 | 152.1 | 167.6            | 168.9            | 152.3            | 141.9            | 118.3            |
| N <sub>2</sub> (side) | 162    | 162.2 | 156.6 | 152.1 |                  |                  |                  |                  |                  |
| H <sub>2</sub>        | 167.2  | 163.0 | 157.2 | 152.0 | 156.9            | 165.2            | 153.2            | 148.8            | 113.0            |
| CO                    | 172.1  | 160.8 | 156.2 | 151.1 | 161.2<br>(C-out) | 164.3<br>(C-out) | 152.3<br>(C-out) | 145.9<br>(C-out) | 117.9<br>(C-out) |
|                       |        |       |       |       | 169.8<br>(C-in)  | 170.5<br>(C-in)  | 146.3<br>(C-in)  | 139.5<br>(C-in)  | 117.9 (C-in)     |
| CO <sub>2</sub>       | 177.5  | 150.5 | 151.0 | 150.2 | 161.1            | 164.0            | 159.1            | 147.4            | 115.1            |
| Water                 | 160.3  | 155.8 | 149.6 | 152.2 | 145.88           | 162.15           | 155.13           | 143.53           | 156.71           |
| He                    | 164.5  | 162.6 | 156.7 | 151.1 | 164.9            | 163.4            | 154.6            | 148.6            | 111.5            |
| CH <sub>4</sub>       | 163.7  | 161.3 | 157.3 | 150.4 | —                | —                | —                | 144.7            | 124.5            |

Parentheses indicate the configuration defined in the text.

**Table S3: The NBO charges derived of adsorbate atoms within T<sub>10</sub> from DFT calculations using the B3LYP functional**

| diatomic            | Out              | In                | Both                    | Isolated           |
|---------------------|------------------|-------------------|-------------------------|--------------------|
| O <sub>2</sub>      | 0.032            | -0.104            | -0.02033<br>( -0.00992) | 0                  |
| N <sub>2</sub>      | 0.066            | -0.093            | -0.028<br>(-0.021)      | 0                  |
| CO - O              | -0.575 [C-in]    | -0.619 [C-out]    | -0.967<br>(-0.987)      | -0.478<br>(-0.488) |
| CO - C              | 0.562 [C-out]    | 0.475 [C-in]      | 0.764<br>(0.790)        | 0.478<br>(-0.488)  |
| H <sub>2</sub>      | 0.064            | -0.076            | -0.009<br>(-0.0091)     | 0                  |
| non-diatomic        |                  |                   |                         |                    |
| Water O             | —                | -0.973 [at plane] | -0.979<br>(-0.98634)    | -0.913<br>(-0.913) |
| Water H             | 0                | 0.523 [at plane]  | 0.483<br>(0.487,0.487)  | 0.457<br>(0.457)   |
| CO <sub>2</sub> - O | 0.126 [at plane] | -0.832            | -0.543<br>(-0.552)      | -0.495<br>(-0.503) |
| CO <sub>2</sub> - C | -0.808           | —                 | 1.068<br>(1.09148)      | 0.990<br>(1.007)   |
| He                  | —                | 0.005 [at plane]  | -0.001<br>(0.00084)     | 0                  |
| CH <sub>4</sub> – H | 0.229            | 0.156             | 0.188,0.241             | 0.202              |
| CH <sub>4</sub> – O | —                | -0.787 [at plane] | -0.858                  | -0.806             |

Parentheses indicate results using the ωB97XD functional.  
Brackets indicate the configuration defined in the text. “at plane” is an atom within the plane of the Si<sub>5</sub> face.

Table S3 shows the NBO charges of of adsorbate atoms within T<sub>10</sub> from DFT calculations using the B3LYP functional. The “out” column shows charges of the atom of the adsorbate molecules when it is at the face but outside the POSS (atom 1 in Figure 2) and “in” when it is inside (atom 2) the POSS. “both” is when the atom is at the center of POSS and “isolated” denotes the free adsorbate (zero for homonuclear diatomic atoms). Atoms indicated in brackets as “at plane” are atoms that are in the plane of the Si<sub>5</sub> face.

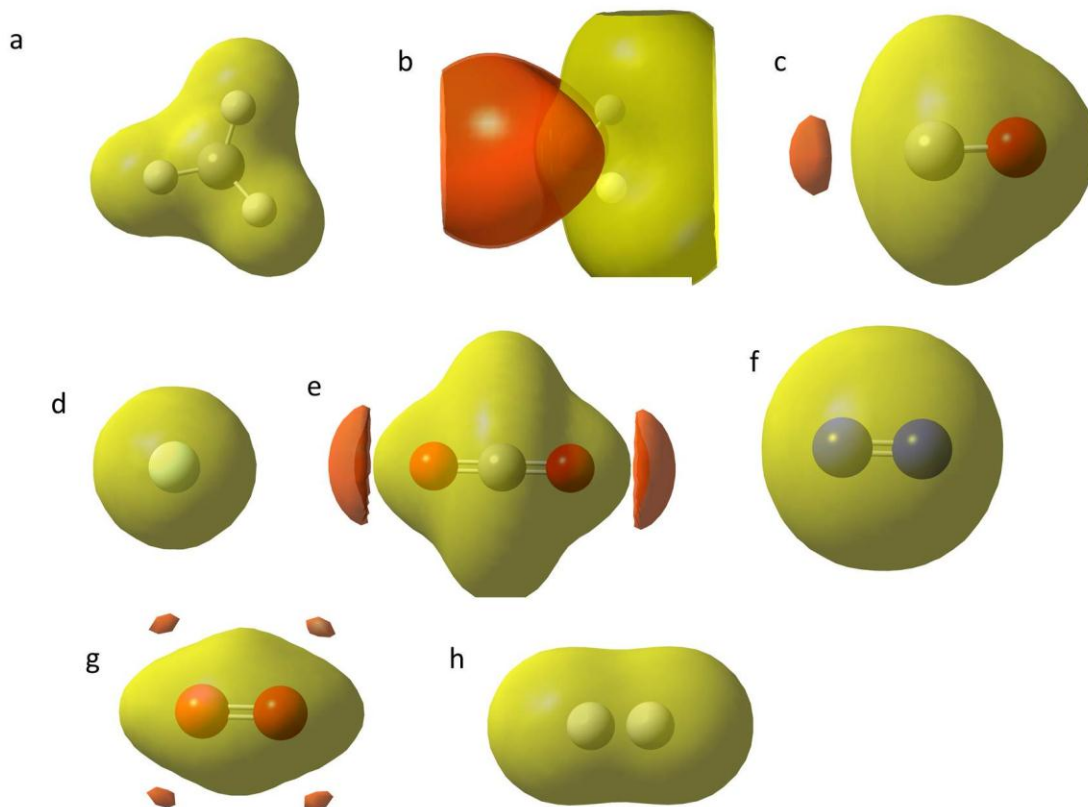

Figure S1 : The electrostatic potential surfaces of the absorbate molecules. Red is negatively charged, yellow is positively charged. The surfaces are set with an isovalue of 0.02 electrons. a)  $\text{CH}_4$ , b)  $\text{H}_2\text{O}$ , c)  $\text{CO}$ , d)  $\text{He}$ , e)  $\text{CO}_2$ , f)  $\text{N}_2$ , g)  $\text{O}_2$ , h)  $\text{H}_2$

Figure S1 shows the electrostatic potential surfaces of the absorbate molecules. The interesting points to note are:  $\text{CH}_4$ ,  $\text{He}$ , and  $\text{H}_2$  do not show any negative charge but are positively charged shapes, roughly the shape of the respective molecule.  $\text{O}_2$  has patches of negative charge positioned away from the oxygen atoms, probably due to the oxygen lone pairs.  $\text{H}_2\text{O}$  has negative charge on the oxygen atom and positive charge on the hydrogen atoms.  $\text{CO}$  has positive charge over the molecule except it has a negative charge patch positioned away from the carbon atom due to the dipole.  $\text{CO}_2$  has two negative charged patches positioned away from the oxygen atoms.

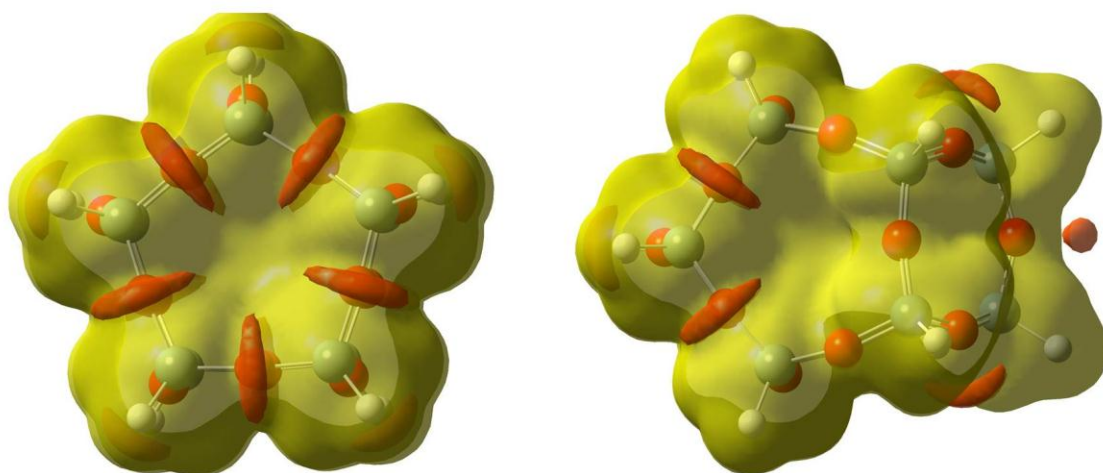

Figure S2 : The electrostatic potential surfaces of the POSS cages. Red is negatively charged, yellow is positively charged. The surfaces are set with an iso-value of 0.02 electrons.

Figure S2 shows the electrostatic potential surfaces of the POSS cages. Both POSS cages mostly have a positively charged surface except for patches of negative charge close to the oxygen atoms. For  $T_{12}$  there are only negative patches close to atoms that are part of FE2 and 'Edge' Si-O-Si angles defined in Figure 1.
